# Supplementary material for: Molecular parallelisms between pigmentation in the avian iris and the integument of ectothermic vertebrates
Source: PubMed Central journal article supplement (PMC7935293; doi:10.1371/journal.pgen.1009404), 2021-02-23

**S1 Fig.** Alignment of multiple bird genomes in the candidate nonsense mutation region. The candidate mutation is highlighted in orange.

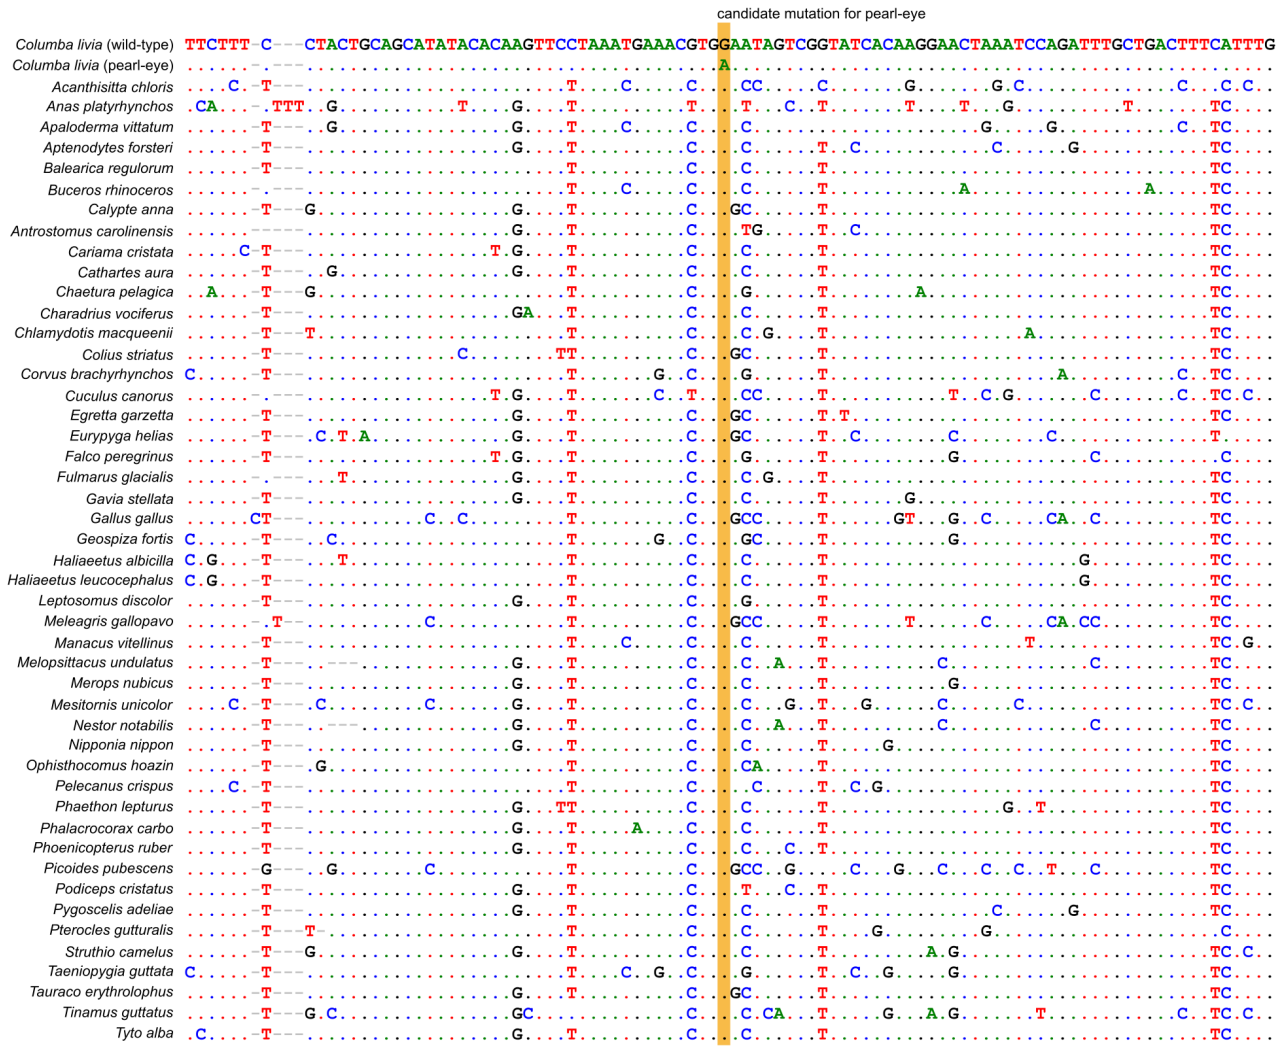

Supplement: pgen.1009404.s001.pdf [file pgen.1009404.s001.pdf]
