# Supplementary material for: Molecular parallelisms between pigmentation in the avian iris and the integument of ectothermic vertebrates
Source: PubMed Central journal article supplement (PMC7935293; doi:10.1371/journal.pgen.1009404), 2021-02-23

**S3 Fig.** Gene expression profiles between pearl-eye (red) and wild-type (yellow) pigeons for candidate genes for skin color development in ectothermic vertebrates. **(A)** Relative expression levels (TPM, transcripts per million) of genes in the pterin synthesis pathway. **(B)** Similar to panel (A) for a group of genes previously implicated in xanthophore differentiation in ectothermic vertebrates.

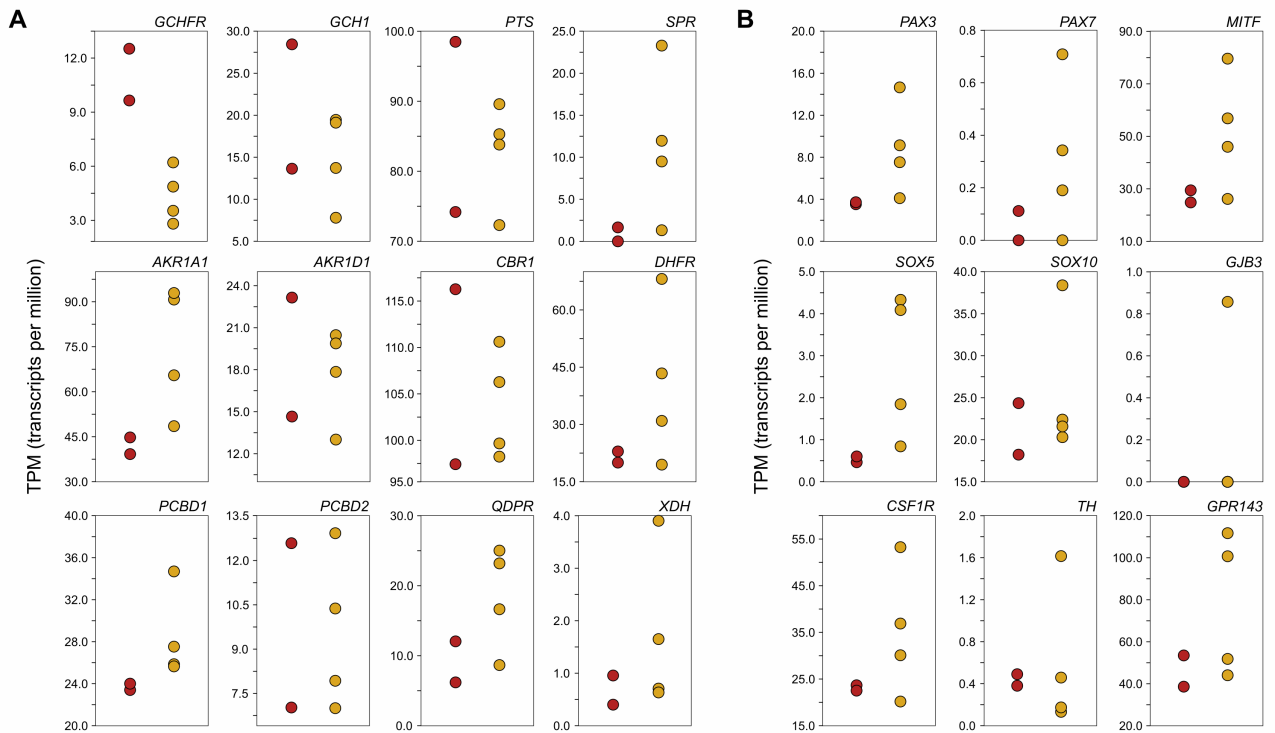

Supplement: pgen.1009404.s003.pdf [file pgen.1009404.s003.pdf]
