# Supplementary material for: Molecular parallelisms between pigmentation in the avian iris and the integument of ectothermic vertebrates
Source: PubMed Central journal article supplement (PMC7935293; doi:10.1371/journal.pgen.1009404), 2021-02-23
Supplement: pgen.1009404.s004.pdf [file pgen.1009404.s004.pdf]

**S1 Table.** Sequencing summary statistics of samples used for whole-genome analyses.

| Sample                  | Phenotype | Number of reads | Percentage of reads mapping (% properly paired) | Depth of coverage | Source of data      |
|-------------------------|-----------|-----------------|-------------------------------------------------|-------------------|---------------------|
| African owl             | wild-type | 173,269,178     | 98.60% (82.84%)                                 | 11.74             | Shapiro et al. 2013 |
| Barb                    | pearl-eye | 185,474,172     | 98.86% (86.04%)                                 | 12.78             | Shapiro et al. 2013 |
| Berlin Longface tumbler | pearl-eye | 169,052,395     | 98.95% (86.10%)                                 | 11.86             | Shapiro et al. 2013 |
| Birmingham roller       | pearl-eye | 154,312,471     | 98.32% (82.08%)                                 | 10.41             | Shapiro et al. 2013 |
| Capuchine               | pearl-eye | 130,038,779     | 98.78% (92.32%)                                 | 13.26             | Shapiro et al. 2013 |
| Cameau                  | pearl-eye | 187,229,032     | 97.93% (81.68%)                                 | 12.19             | Shapiro et al. 2013 |
| Chinese owl             | wild-type | 143,024,193     | 98.47% (81.50%)                                 | 9.40              | Shapiro et al. 2013 |
| Cumulet                 | pearl-eye | 161,028,200     | 99.02% (86.18%)                                 | 11.34             | Shapiro et al. 2013 |
| Dewlap                  | wild-type | 190,474,160     | 99.12% (83.54%)                                 | 13.02             | Shapiro et al. 2013 |
| English carrier         | wild-type | 169,828,550     | 99.17% (83.85%)                                 | 12.07             | Shapiro et al. 2013 |
| English pouter          | wild-type | 181,082,994     | 98.21% (82.83%)                                 | 12.27             | Shapiro et al. 2013 |
| English trumpeter       | wild-type | 220,249,265     | 98.61% (83.52%)                                 | 14.75             | Shapiro et al. 2013 |
| English tumbler         | pearl-eye | 128,545,752     | 98.57% (83.83%)                                 | 8.84              | Shapiro et al. 2013 |
| Frillback               | wild-type | 201,071,108     | 99.21% (83.97%)                                 | 14.24             | Shapiro et al. 2013 |
| Jacobin                 | pearl-eye | 142,153,711     | 98.80% (84.19%)                                 | 9.96              | Shapiro et al. 2013 |
| King                    | wild-type | 188,217,742     | 98.81% (83.42%)                                 | 12.75             | Shapiro et al. 2013 |
| Marchenero              | wild-type | 215,517,315     | 98.39% (89.07%)                                 | 15.71             | Shapiro et al. 2013 |
| Oriental frill          | wild-type | 134,181,191     | 98.69% (81.77%)                                 | 8.10              | Shapiro et al. 2013 |
| Oriental roller         | pearl-eye | 139,191,535     | 98.25% (82.94%)                                 | 9.43              | Shapiro et al. 2013 |
| Parlor roller           | pearl-eye | 126,760,365     | 99.02% (82.52%)                                 | 8.68              | Shapiro et al. 2013 |
| Saxon pouer             | wild-type | 224,405,779     | 99.22% (84.47%)                                 | 15.92             | Shapiro et al. 2013 |
| Swift                   | wild-type | 182,394,464     | 99.14% (81.83%)                                 | 12.23             | Shapiro et al. 2013 |
| pigeonGOLDEN01          | wild-type | 53,335,247      | 99.26% (96.85%)                                 | 6.15              | this study          |
| pigeonGOLDEN02          | wild-type | 82,803,568      | 99.31% (97.33%)                                 | 9.68              | this study          |
| pigeonGOLDEN03          | wild-type | 88,804,014      | 99.24% (97.04%)                                 | 10.3              | this study          |
| pigeonGOLDEN04          | wild-type | 215,598,145     | 99.56% (97.34%)                                 | 25.57             | this study          |
| pigeonGOLDEN05          | wild-type | 54,557,343      | 99.57% (97.09%)                                 | 6.48              | this study          |
| pigeonGOLDEN06          | wild-type | 103,423,810     | 99.55% (97.60%)                                 | 12.33             | this study          |
| pigeonGOLDEN07          | wild-type | 53,278,237      | 99.60% (97.71%)                                 | 6.34              | this study          |
| pigeonGOLDEN08          | wild-type | 51,686,262      | 99.26% (96.76%)                                 | 5.94              | this study          |
| pigeonGOLDEN09          | wild-type | 296,020,053     | 99.55% (97.54%)                                 | 35.37             | this study          |
| pigeonGOLDEN10          | wild-type | 45,105,900      | 99.46% (97.01%)                                 | 5.18              | this study          |
| pigeonGOLDEN11          | wild-type | 88,676,787      | 99.50% (97.54%)                                 | 10.35             | this study          |
| pigeonGOLDEN12          | wild-type | 49,553,471      | 99.48% (97.61%)                                 | 5.94              | this study          |
| pigeonGOLDEN13          | wild-type | 56,101,301      | 99.18% (96.76%)                                 | 6.56              | this study          |
| pigeonGOLDEN14          | wild-type | 49,013,227      | 98.84% (95.71%)                                 | 5.56              | this study          |
| pigeonWHITE01           | pearl-eye | 77,715,988      | 99.47% (97.52%)                                 | 9.09              | this study          |
| pigeonWHITE02           | pearl-eye | 53,381,471      | 99.58% (97.33%)                                 | 6.24              | this study          |
| pigeonWHITE03           | pearl-eye | 145,486,326     | 99.55% (97.38%)                                 | 17.34             | this study          |
| pigeonWHITE04           | pearl-eye | 122,687,100     | 99.23% (96.69%)                                 | 13.69             | this study          |
| pigeonWHITE05           | pearl-eye | 64,037,689      | 99.25% (97.37%)                                 | 7.46              | this study          |
| pigeonWHITE06           | pearl-eye | 82,557,408      | 99.26% (97.56%)                                 | 9.6               | this study          |
| pigeonWHITE07           | pearl-eye | 83,134,197      | 99.26% (97.79%)                                 | 9.73              | this study          |
| pigeonWHITE08           | pearl-eye | 82,285,232      | 99.37% (95.78%)                                 | 9.28              | this study          |
| pigeonWHITE09           | pearl-eye | 82,846,357      | 99.35% (97.17%)                                 | 9.43              | this study          |
| pigeonWHITE10           | pearl-eye | 296,258,378     | 99.31% (96.81%)                                 | 34.68             | this study          |
| pigeonWHITE11           | pearl-eye | 60,046,396      | 99.45% (97.41%)                                 | 7.2               | this study          |
| pigeonWHITE12           | pearl-eye | 95,854,728      | 99.46% (97.29%)                                 | 11.56             | this study          |
| pigeonWHITE13           | pearl-eye | 109,943,644     | 99.52% (97.66%)                                 | 13.3              | this study          |
| pigeonWHITE14           | pearl-eye | 57,792,666      | 99.05% (96.09%)                                 | 6.77              | this study          |
| pigeonWHITE15           | pearl-eye | 73,667,184      | 99.25% (96.87%)                                 | 8.71              | this study          |
