# Supplementary material for: Molecular parallelisms between pigmentation in the avian iris and the integument of ectothermic vertebrates
Source: PubMed Central journal article supplement (PMC7935293; doi:10.1371/journal.pgen.1009404), 2021-02-23
Supplement: pgen.1009404.s005.pdf [file pgen.1009404.s005.pdf]

**S2 Table.** Summary statistics of samples used for RNA sequencing and allele counts at the candidate causal mutation (AKCR02000030.1:1,895,934bp). Genotypes were determined through Sanger sequencing.

| Sample        | Phenotype | Genotype | Number of reads | Counts for allelic imbalance |
|---------------|-----------|----------|-----------------|------------------------------|
| pigeonWHITE1  | pearl-eye | A/A      | 39,343,316      | -                            |
| pigeonWHITE2  | pearl-eye | A/A      | 80,639,482      | -                            |
| pigeonYELLOW1 | wild-type | G/G      | 67,159,062      | -                            |
| pigeonYELLOW2 | wild-type | G/A      | 138,052,048     | G=53 / A=2                   |
| pigeonYELLOW3 | wild-type | G/A      | 98,333,946      | G=36 / A=10                  |
| pigeonYELLOW4 | wild-type | G/A      | 135,116,756     | G=63 / A=16                  |

NOTE: G – wild-type allele; A – pearl-eye allele
