# Supplementary material for: Molecular parallelisms between pigmentation in the avian iris and the integument of ectothermic vertebrates
Source: PubMed Central journal article supplement (PMC7935293; doi:10.1371/journal.pgen.1009404), 2021-02-23
Supplement: pgen.1009404.s006.pdf [file pgen.1009404.s006.pdf]

**S3 Table.** List of differentially expressed genes between the iris of wild-type and pearl-eye pigeons. Negative fold-change values indicate down-regulation in pearl-eye iris. Linkage group information follows the genetic map of [18]. Genes located in linkage group 20 (the same as the putative causal locus) are marked in **bold**.

| Transcript                         | Linkage group | Gene                   | Product                                                                             | Log fold-change | P-value         | FDR-corrected P |
|------------------------------------|---------------|------------------------|-------------------------------------------------------------------------------------|-----------------|-----------------|-----------------|
| lc AKCR02000001.1_mrna_400         | 2             | <i>FAM110B</i>         | family with sequence similarity 110, member B, transcript variant X1                | -7.44           | 4.71E-14        | 2.14E-10        |
| lc AKCR02000001.1_mrna_502         | 2             | <i>MIB1</i>            | mindbomb E3 ubiquitin protein ligase 1, transcript variant X3                       | -6.49           | 1.14E-04        | 2.87E-02        |
| lc AKCR02000001.1_mrna_740         | 2             | <i>ZNF622</i>          | zinc finger protein 622, transcript variant X1                                      | -8.28           | 5.60E-07        | 4.77E-04        |
| lc AKCR02000004.1_mrna_2854        | 2             | <i>CAPN7</i>           | calpain 7, transcript variant X1                                                    | -6.60           | 1.84E-05        | 8.35E-03        |
| lc AKCR02000006.1_mrna_3665        | 4             | <i>ACOX3</i>           | acyl-CoA oxidase 3, pristanoyl, transcript variant X1                               | -5.79           | 5.09E-05        | 1.65E-02        |
| lc AKCR02000006.1_mrna_3997        | 4             | <i>RWDD4</i>           | RWD domain containing 4, transcript variant X1                                      | -2.37           | 1.01E-05        | 5.40E-03        |
| lc AKCR02000008.1_mrna_4434        | 1             | <i>PACSN2</i>          | protein kinase C and casein kinase substrate in neurons 2, transcript variant X2    | -4.46           | 4.36E-05        | 1.61E-02        |
| lc AKCR02000011.1_ncrna_5318       | 5             | LOC102090964           | uncharacterized LOC102090964, transcript variant X2                                 | -7.34           | 1.76E-04        | 4.00E-02        |
| lc AKCR02000011.1_mrna_5348        | 5             | <i>AP2A2</i>           | adaptor-related protein complex 2, alpha 2 subunit, transcript variant X1           | -3.17           | 7.06E-05        | 2.15E-02        |
| lc AKCR02000011.1_mrna_5471        | 5             | <i>USP47</i>           | ubiquitin specific peptidase 47, transcript variant X1                              | -7.22           | 1.89E-06        | 1.33E-03        |
| lc AKCR02000013.1_mrna_5823        | 4             | <i>SPP1</i>            | secreted phosphoprotein 1                                                           | -2.73           | 7.39E-07        | 5.92E-04        |
| lc AKCR02000014.1_mrna_5976        | 6             | <i>CLASPI</i>          | cytoplasmic linker associated protein 1, transcript variant X6                      | -4.22           | 3.71E-05        | 1.40E-02        |
| lc AKCR02000014.1_mrna_6035        | 6             | <i>INSIG2</i>          | insulin induced gene 2, transcript variant X2                                       | -9.14           | 1.31E-16        | 1.78E-12        |
| lc AKCR02000014.1_mrna_6101        | 6             | <i>PRPF40A</i>         | PRP40 pre-mRNA processing factor 40 homolog A, transcript variant X3                | -3.86           | 1.63E-04        | 3.89E-02        |
| lc AKCR02000016.1_mrna_6314        | 7             | <i>ANXA7</i>           | annexin A7, transcript variant X2                                                   | -8.36           | 2.64E-10        | 5.99E-07        |
| lc AKCR02000016.1_mrna_6316        | 7             | <i>PPP3CB</i>          | protein phosphatase 3, catalytic subunit, beta isozyme, transcript variant X2       | -6.39           | 1.12E-04        | 2.87E-02        |
| lc AKCR02000017.1_mrna_6671        | 7             | <i>FGFR2</i>           | fibroblast growth factor receptor 2, transcript variant X6                          | -5.69           | 1.13E-04        | 2.87E-02        |
| lc AKCR02000017.1_mrna_6678        | 7             | <i>ATE1</i>            | arginyltransferase 1, transcript variant X2                                         | -3.96           | 1.13E-06        | 8.57E-04        |
| lc AKCR02000018.1_mrna_6866        | 8             | <i>RWDD3</i>           | RWD domain containing 3, transcript variant X1                                      | -3.71           | 1.58E-04        | 3.83E-02        |
| lc AKCR02000018.1_mrna_6931        | 8             | <i>DDAH1</i>           | dimethylarginine dimethylaminohydrolase 1                                           | -2.00           | 8.78E-05        | 2.54E-02        |
| lc AKCR02000022.1_ncrna_7812       | 12            | LOC102098775           | uncharacterized LOC102098775                                                        | -7.42           | 1.72E-07        | 2.13E-04        |
| lc AKCR02000023.1_mrna_7908        | 15            | <i>CMC4</i>            | C-x(9)-C motif containing 4, transcript variant X2                                  | -6.45           | 1.69E-07        | 2.13E-04        |
| lc AKCR02000029.1_mrna_8762        | Z             | <i>NUDT12</i>          | nudix (nucleoside diphosphate linked moiety X)-type motif 12, transcript variant X2 | -7.49           | 3.49E-08        | 5.93E-05        |
| <b>lc AKCR02000030.1_mrna_8889</b> | <b>20</b>     | <b><i>SLC2A11B</i></b> | <b>solute carrier family 2, facilitated glucose transporter member 11-like</b>      | <b>-1.54</b>    | <b>3.77E-07</b> | <b>3.76E-04</b> |
| lc AKCR02000031.1_mrna_9103        | 14            | <i>NDRG4</i>           | NDRG family member 4, transcript variant X4                                         | -10.76          | 6.25E-16        | 4.25E-12        |
| lc AKCR02000033.1_mrna_9571        | 19            | <i>USP3</i>            | ubiquitin specific peptidase 3, transcript variant X2                               | -3.28           | 5.29E-05        | 1.68E-02        |
| lc AKCR02000043.1_mrna_10560       | 18            | <i>STRBP</i>           | spermatid perinuclear RNA binding protein, transcript variant X5                    | -6.36           | 1.73E-04        | 4.00E-02        |
| lc AKCR02000043.1_mrna_10703       | 18            | <i>FAM73B</i>          | family with sequence similarity 73, member B, transcript variant X2                 | -7.14           | 4.08E-07        | 3.76E-04        |
| lc AKCR02000043.1_mrna_10737       | 18            | <i>ODF2</i>            | outer dense fiber of sperm tails 2, transcript variant X1                           | -6.29           | 2.01E-04        | 4.34E-02        |
| lc AKCR02000044.1_ncrna_10984      | 21            | LOC102092662           | uncharacterized LOC102092662, transcript variant X7                                 | -1.90           | 1.47E-04        | 3.64E-02        |
| lc AKCR02000069.1_mrna_13024       | 7             | <i>UBE2D1</i>          | ubiquitin-conjugating enzyme E2D 1, transcript variant X5                           | -3.49           | 1.63E-05        | 7.94E-03        |
| lc AKCR02000081.1_mrna_13565       | 17            | <i>SETD5</i>           | SET domain containing 5, transcript variant X1                                      | -5.85           | 1.36E-05        | 6.88E-03        |
| lc AKCR02000084.1_mrna_13655       | 16            | <i>NFRKB</i>           | nuclear factor related to kappaB binding protein, transcript variant X2             | -3.87           | 4.93E-05        | 1.64E-02        |
| lc AKCR02000093.1_mrna_14043       | 17            | <i>NR2C2</i>           | nuclear receptor subfamily 2, group C, member 2, transcript variant X1              | -6.15           | 5.29E-06        | 3.13E-03        |
| lc AKCR02000094.1_mrna_14114       | 2             | <i>PTHB1-like</i>      | protein PTHB1-like                                                                  | -6.01           | 1.76E-04        | 4.00E-02        |
| lc AKCR02000096.1_mrna_14183       | 4             | <i>FNIP2</i>           | folliculin interacting protein 2, transcript variant X1                             | -5.83           | 8.38E-05        | 2.48E-02        |

|                                     |           |                      |                                                                                                           |             |                 |                 |
|-------------------------------------|-----------|----------------------|-----------------------------------------------------------------------------------------------------------|-------------|-----------------|-----------------|
| lcl AKCR02000109.1_mrna_14615       | 11        | <i>NSG2</i>          | neuron-specific protein family member 2, transcript variant X1                                            | -1.63       | 1.72E-05        | 8.10E-03        |
| lcl AKCR02000137.1_mrna_15413       | 44        | <i>CLCN3</i>         | chloride channel, voltage-sensitive 3, transcript variant X2                                              | -3.39       | 1.96E-06        | 1.33E-03        |
| lcl AKCR02000205.1_mrna_16786       | n/a       | <i>CHTOP</i>         | chromatin target of PRMT1, transcript variant X2                                                          | -8.91       | 1.11E-11        | 3.01E-08        |
| lcl AKCR02000382.1_ncrna_18045      | n/a       | LOC102094279         | uncharacterized LOC102094279                                                                              | -6.63       | 1.03E-05        | 5.40E-03        |
| lcl AKCR02000001.1_mrna_663         | 2         | <i>PCBP3</i>         | poly(rC)-binding protein 3, transcript variant X5                                                         | 5.97        | 9.42E-09        | 1.83E-05        |
| lcl AKCR02000002.1_mrna_998         | 3         | <i>RNASET2</i>       | ribonuclease T2, transcript variant X2                                                                    | 3.95        | 2.52E-07        | 2.86E-04        |
| lcl AKCR02000003.1_mrna_1726        | 1         | <i>IGSF5</i>         | immunoglobulin superfamily, member 5, transcript variant X2                                               | 5.19        | 7.10E-05        | 2.15E-02        |
| lcl AKCR02000010.1_mrna_5105        | 6         | <i>UBR3</i>          | ubiquitin protein ligase E3 component n-recogin 3 (putative), transcript variant X3                       | 5.10        | 9.68E-05        | 2.69E-02        |
| lcl AKCR02000011.1_mrna_5402        | 5         | <i>SAAL</i>          | serum amyloid A protein-like                                                                              | 1.23        | 3.24E-05        | 1.38E-02        |
| lcl AKCR02000016.1_mrna_6318        | 7         | <i>PPP3CB</i>        | protein phosphatase 3, catalytic subunit, beta isozyme, transcript variant X1                             | 4.05        | 4.14E-07        | 3.76E-04        |
| lcl AKCR02000019.1_ncrna_7006       | 19        | LOC102088835         | uncharacterized LOC102088835                                                                              | 6.01        | 2.23E-06        | 1.44E-03        |
| <b>lcl AKCR02000030.1_mrna_8893</b> | <b>20</b> | <b><i>CHEK2</i></b>  | <b>checkpoint kinase 2, transcript variant X3</b>                                                         | <b>1.82</b> | <b>4.93E-05</b> | <b>1.64E-02</b> |
| <b>lcl AKCR02000030.1_mrna_8949</b> | <b>20</b> | <b><i>TRAFD1</i></b> | <b>TRAF-type zinc finger domain containing 1, transcript variant X3</b>                                   | <b>6.14</b> | <b>4.63E-05</b> | <b>1.62E-02</b> |
| lcl AKCR02000033.1_mrna_9582        | 19        | <i>TPM1</i>          | tropomyosin 1 (alpha), transcript variant X1                                                              | 1.47        | 8.51E-06        | 4.83E-03        |
| lcl AKCR02000042.1_mrna_10423       | 13        | <i>EC11</i>          | enoyl-CoA delta isomerase 1, transcript variant X2                                                        | 6.54        | 2.88E-12        | 9.80E-09        |
| lcl AKCR02000044.1_ncrna_10985      | 21        | LOC102092662         | uncharacterized LOC102092662, transcript variant X2                                                       | 1.93        | 3.61E-05        | 1.40E-02        |
| lcl AKCR02000054.1_mrna_11884       | 14        | <i>SLC7A6</i>        | solute carrier family 7 (amino acid transporter light chain, y+L system), member 6, transcript variant X3 | 5.84        | 3.54E-05        | 1.40E-02        |
| lcl AKCR02000071.1_mrna_13251       | 11        | <i>MED7</i>          | mediator complex subunit 7, transcript variant X2                                                         | 1.48        | 4.21E-08        | 6.37E-05        |
| lcl AKCR02000084.1_mrna_13658       | 16        | <i>PRDM10</i>        | PR domain zinc finger protein 10, transcript variant X3                                                   | 5.08        | 4.62E-05        | 1.62E-02        |
| lcl AKCR02000104.1_ncrna_14427      | 11        | LOC10209304          | uncharacterized LOC102093048, transcript variant X2                                                       | 5.81        | 2.86E-05        | 1.26E-02        |
| lcl AKCR02000140.1_ncrna_15477      | 1         | LOC106146049         | uncharacterized LOC106146049                                                                              | 2.51        | 4.90E-06        | 3.03E-03        |
| lcl AKCR02000172.1_mrna_16226       | n/a       | <i>HPCA</i>          | hippocalcin                                                                                               | 4.38        | 9.20E-05        | 2.61E-02        |
| lcl AKCR02000199.1_mrna_16675       | n/a       | <i>RGCC</i>          | regulator of cell cycle                                                                                   | 1.57        | 1.01E-04        | 2.75E-02        |
| lcl AKCR02000201.1_mrna_16731       | 29        | <i>KRT14</i>         | keratin, type I cytoskeletal 14, transcript variant X2                                                    | 3.91        | 2.07E-04        | 4.40E-02        |
| lcl AKCR02000205.1_mrna_16792       | n/a       | <i>S100A16</i>       | S100 calcium binding protein A16                                                                          | 1.95        | 1.82E-04        | 4.00E-02        |
| lcl AKCR02000968.1_ncrna_18603      | n/a       | LOC106145929         | uncharacterized LOC106145929                                                                              | 1.31        | 1.06E-04        | 2.83E-02        |
| lcl AKCR02001022.1_mrna_18627       | n/a       | <i>SLC27A2</i>       | very long-chain acyl-CoA synthetase-like                                                                  | 2.91        | 3.59E-05        | 1.40E-02        |
| lcl AKCR02003528.1_mrna_18908       | n/a       | <i>TLR1</i>          | toll-like receptor 1                                                                                      | 3.57        | 1.79E-04        | 4.00E-02        |
